# Supplementary material
Source: PubMed Central journal article supplement (PMC7199780)

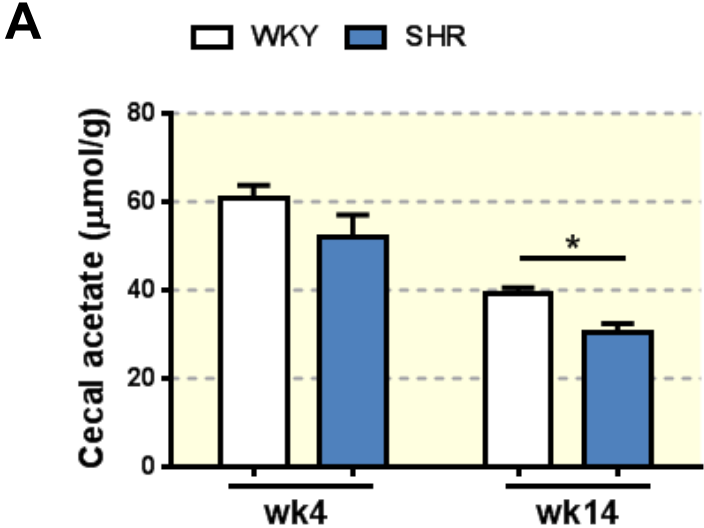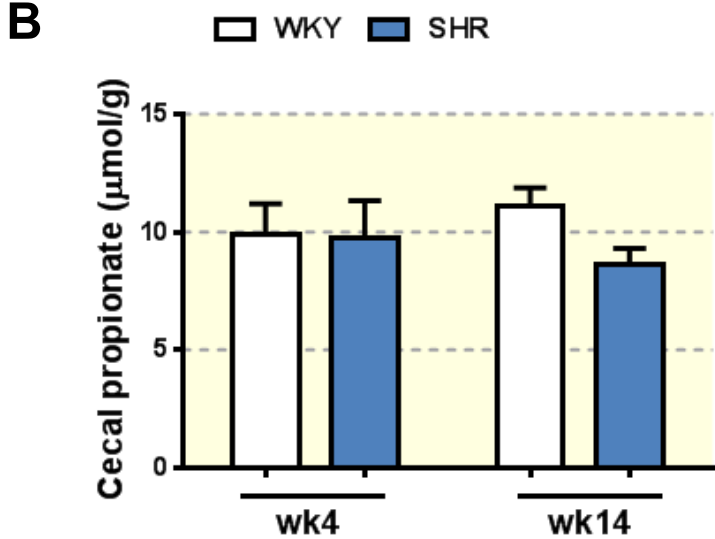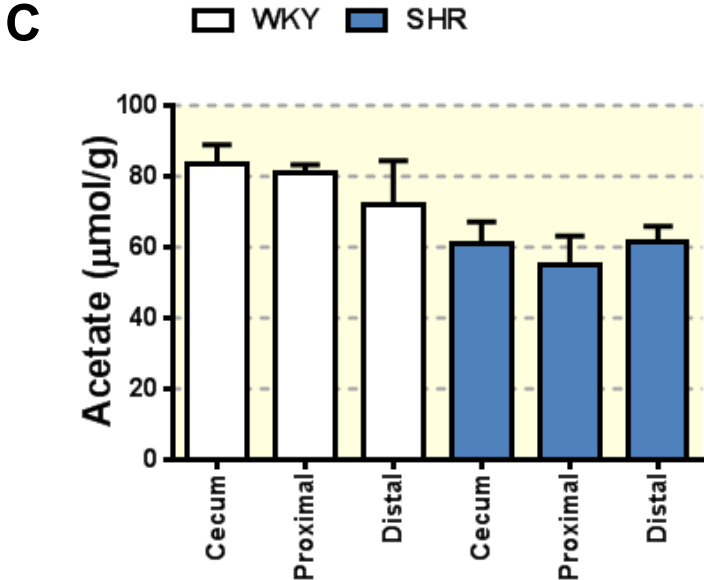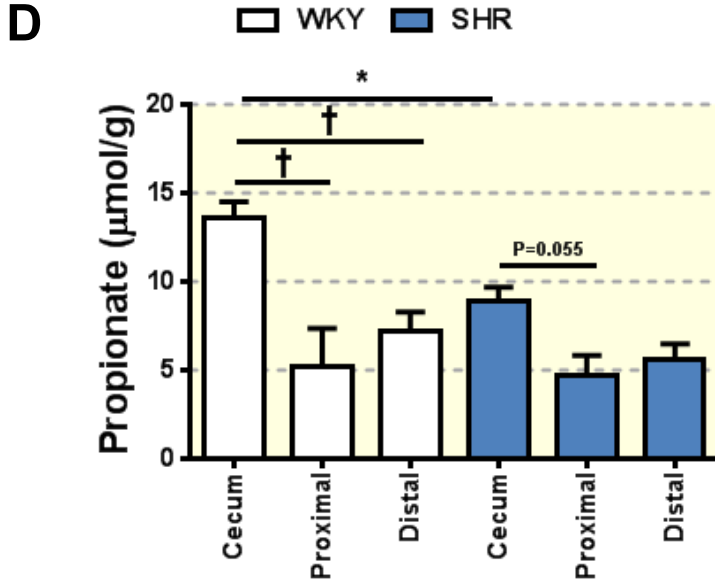

**A**

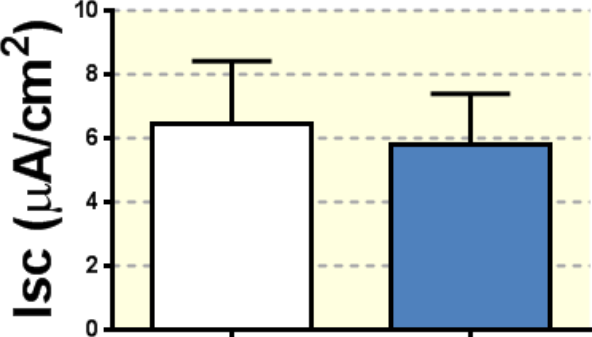

**B**

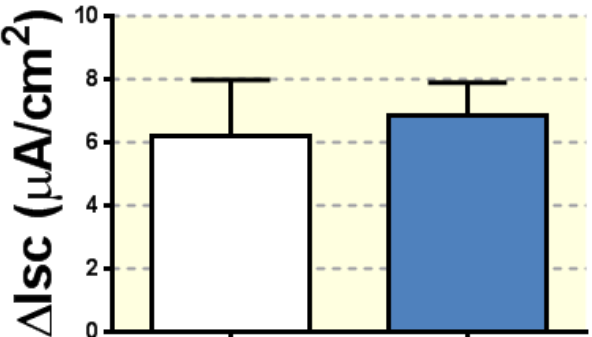

**C**

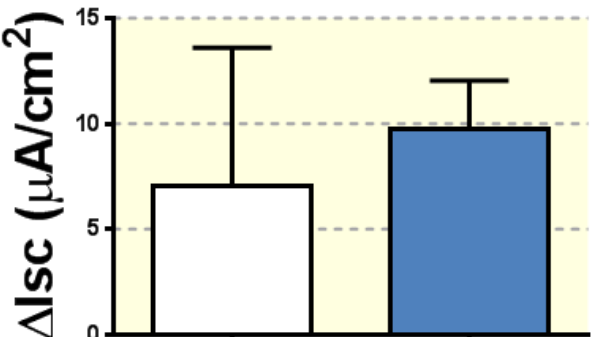

□ WKY    ■ SHR

Figure S3

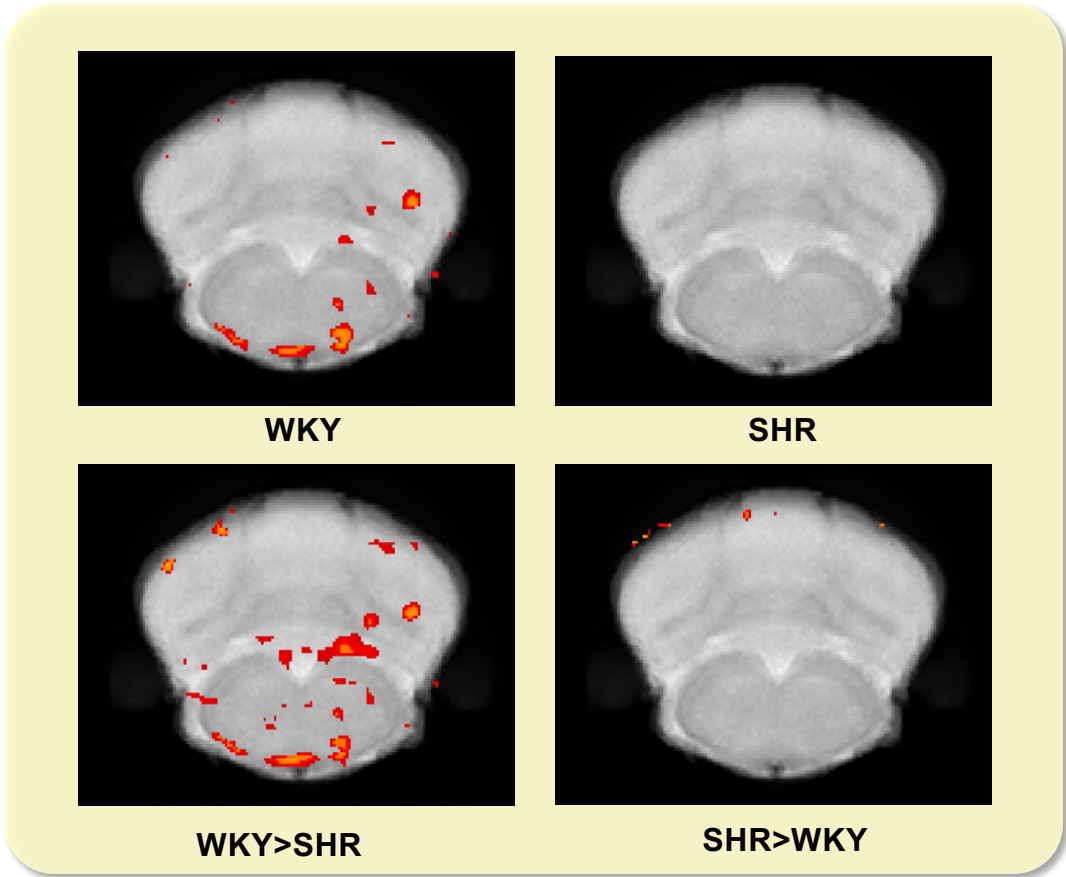

Supplement: NIHMS1065411-supplement-supplemental.pdf [file NIHMS1065411-supplement-supplemental.pdf]
